# Supplementary material
Source: publisher site journal article supplement (https://www.dovepress.com/article/461343)
Supplement: Supplementary file 1 [file get_supplementary_file.php]

## Supplementary Material 1. CONSORT Checklist

|                                     |     | Reporting Item                                                                                                                                                 | Page Number                                             |
|-------------------------------------|-----|----------------------------------------------------------------------------------------------------------------------------------------------------------------|---------------------------------------------------------|
| <b>Title and Abstract</b>           |     |                                                                                                                                                                |                                                         |
| Title                               | #1a | Identification as a randomized trial in the title.                                                                                                             | 1                                                       |
| Abstract                            | #1b | Structured summary of trial design, methods, results, and conclusions                                                                                          | 1                                                       |
| <b>Introduction</b>                 |     |                                                                                                                                                                |                                                         |
| Background and objectives           | #2a | Scientific background and explanation of rationale                                                                                                             | 3                                                       |
| Background and objectives           | #2b | Specific objectives or hypothesis                                                                                                                              | 3-4                                                     |
| <b>Methods</b>                      |     |                                                                                                                                                                |                                                         |
| Trial design                        | #3a | Description of trial design (such as parallel, factorial) including allocation ratio.                                                                          | 4-5                                                     |
| Trial design                        | #3b | Important changes to methods after trial commencement (such as eligibility criteria), with reasons                                                             | N/A - no changes to methods were made after study start |
| Participants                        | #4a | Eligibility criteria for participants                                                                                                                          | 4                                                       |
| Participants                        | #4b | Settings and locations where the data were collected                                                                                                           | 4                                                       |
| Interventions                       | #5  | The experimental and control interventions for each group with sufficient details to allow replication, including how and when they were actually administered | 5-6                                                     |
| Outcomes                            | #6a | Completely defined prespecified primary and secondary outcome measures, including how and when they were assessed                                              | 6                                                       |
| Outcomes                            | #6b | Any changes to trial outcomes after the trial commenced, with reasons                                                                                          | N/A - no changes to outcomes after study start          |
| Sample size                         | #7a | How sample size was determined.                                                                                                                                | 7                                                       |
| Sample size                         | #7b | When applicable, explanation of any interim analyses and stopping guidelines                                                                                   | N/A                                                     |
| Randomization - Sequence generation | #8a | Method used to generate the random allocation sequence.                                                                                                        | 4-5                                                     |

|                                                  |      |                                                                                                                                                                                             |       |
|--------------------------------------------------|------|---------------------------------------------------------------------------------------------------------------------------------------------------------------------------------------------|-------|
| Randomization - Sequence generation              | #8b  | Type of randomization; details of any restriction (such as blocking and block size)                                                                                                         | 4-5   |
| Randomization - Allocation concealment mechanism | #9   | Mechanism used to implement the random allocation sequence (such as sequentially numbered containers), describing any steps taken to conceal the sequence until interventions were assigned | 5     |
| Randomization - Implementation                   | #10  | Who generated the allocation sequence, who enrolled participants, and who assigned participants to interventions                                                                            | 5     |
| Blinding                                         | #11a | If done, who was blinded after assignment to interventions (for example, participants, care providers, those assessing outcomes) and how.                                                   | 5     |
| Blinding                                         | #11b | If relevant, description of the similarity of interventions                                                                                                                                 | 5     |
| Statistical methods                              | #12a | Statistical methods used to compare groups for primary and secondary outcomes                                                                                                               | 7     |
| Statistical methods                              | #12b | Methods for additional analyses, such as subgroup analyses and adjusted analyses                                                                                                            | 7     |
| Results                                          |      |                                                                                                                                                                                             |       |
| Participant flow diagram (strongly recommended)  | #13a | For each group, the numbers of participants who were randomly assigned, received intended treatment, and were analysed for the primary outcome                                              | 8     |
| Participant flow                                 | #13b | For each group, losses and exclusions after randomization, together with reason                                                                                                             | 8     |
| Recruitment                                      | #14a | Dates defining the periods of recruitment and follow-up                                                                                                                                     | 4     |
| Recruitment                                      | #14b | Why the trial ended or was stopped                                                                                                                                                          | N/A   |
| Baseline data                                    | #15  | A table showing baseline demographic and clinical characteristics for each group                                                                                                            | 9-11  |
| Numbers analysed                                 | #16  | For each group, number of participants (denominator) included in each analysis and whether the analysis was by original assigned groups                                                     | 9-11  |
| Outcomes and estimation                          | #17a | For each primary and secondary outcome, results for each group, and the estimated effect size and its precision (such as 95% confidence interval)                                           | 13-14 |
| Outcomes and estimation                          | #17b | For binary outcomes, presentation of both absolute and relative effect sizes is recommended                                                                                                 | 14    |
| Ancillary analyses                               | #18  | Results of any other analyses performed, including subgroup analyses and adjusted analyses, distinguishing pre-specified from exploratory                                                   | 13-14 |

|                          |     |                                                                                                                  |       |
|--------------------------|-----|------------------------------------------------------------------------------------------------------------------|-------|
| Harms                    | #19 | All important harms or unintended effects in each group (For specific guidance see CONSORT for harms)            | 15    |
| <b>Discussion</b>        |     |                                                                                                                  |       |
| Limitations              | #20 | Trial limitations, addressing sources of potential bias, imprecision, and, if relevant, multiplicity of analyses | 16    |
| Generalisability         | #21 | Generalisability (external validity, applicability) of the trial findings                                        | 16    |
| Interpretation           | #22 | Interpretation consistent with results, balancing benefits and harms, and considering other relevant evidence    | 15-16 |
| Registration             | #23 | Registration number and name of trial registry                                                                   | 6     |
| <b>Other information</b> |     |                                                                                                                  |       |
| Interpretation           | #22 | Interpretation consistent with results, balancing benefits and harms, and considering other relevant evidence    | 15-16 |
| Registration             | #23 | Registration number and name of trial registry                                                                   | 6     |
| Protocol                 | #24 | Where the full trial protocol can be accessed, if available                                                      | 6     |
| Funding                  | #25 | Sources of funding and other support (such as supply of drugs), role of funders                                  | 18    |
